# Supplementary material for: Human stress monitoring through an organic cotton-fiber biosensor
Source: Royal Society of Chemistry journal article supplement (doi:10.1039/c4tb00317a), 2014-01-01
Supplement: c4tb00317a1.pdf [file c4tb00317a1.pdf]

### Supporting information

Bending properties of functionalized cotton fiber:

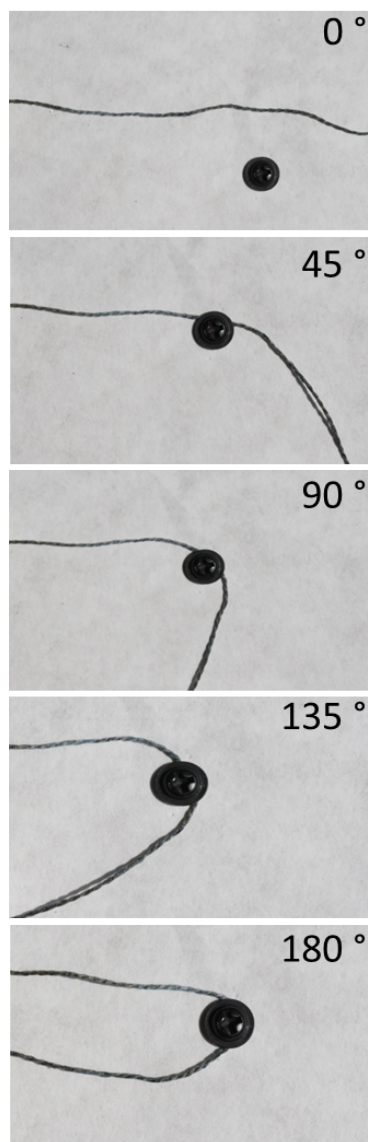

**Figure S1:** Cotton fiber functionalized with PEDOT:PSS at different bending angles

| Bending Angle (degrees) | 0 ° | 45 ° | 90 ° | 135 ° | 180 ° |
|-------------------------|-----|------|------|-------|-------|
| Fiber Resistance (KOhm) | 52  | 54   | 55   | 54    | 58    |

**Table S2:** Resistance along the whole functionalized cotton fiber (11 cm) in function of bending angle

The cotton fiber retains bending properties after the PEDOT:PSS functionalization. No significant changes in conductivity are measured.
